# Supplementary figures and images for: Detecting the Candidate Gender Determinants by Bioinformatic Prediction of miRNAs and Their Targets from Transcriptome Sequences of the Male and Female Flowers in Salix suchowensis
Source: Hindawi journal article supplement (doi:10.1155/2017/9614596), 2017-01-01

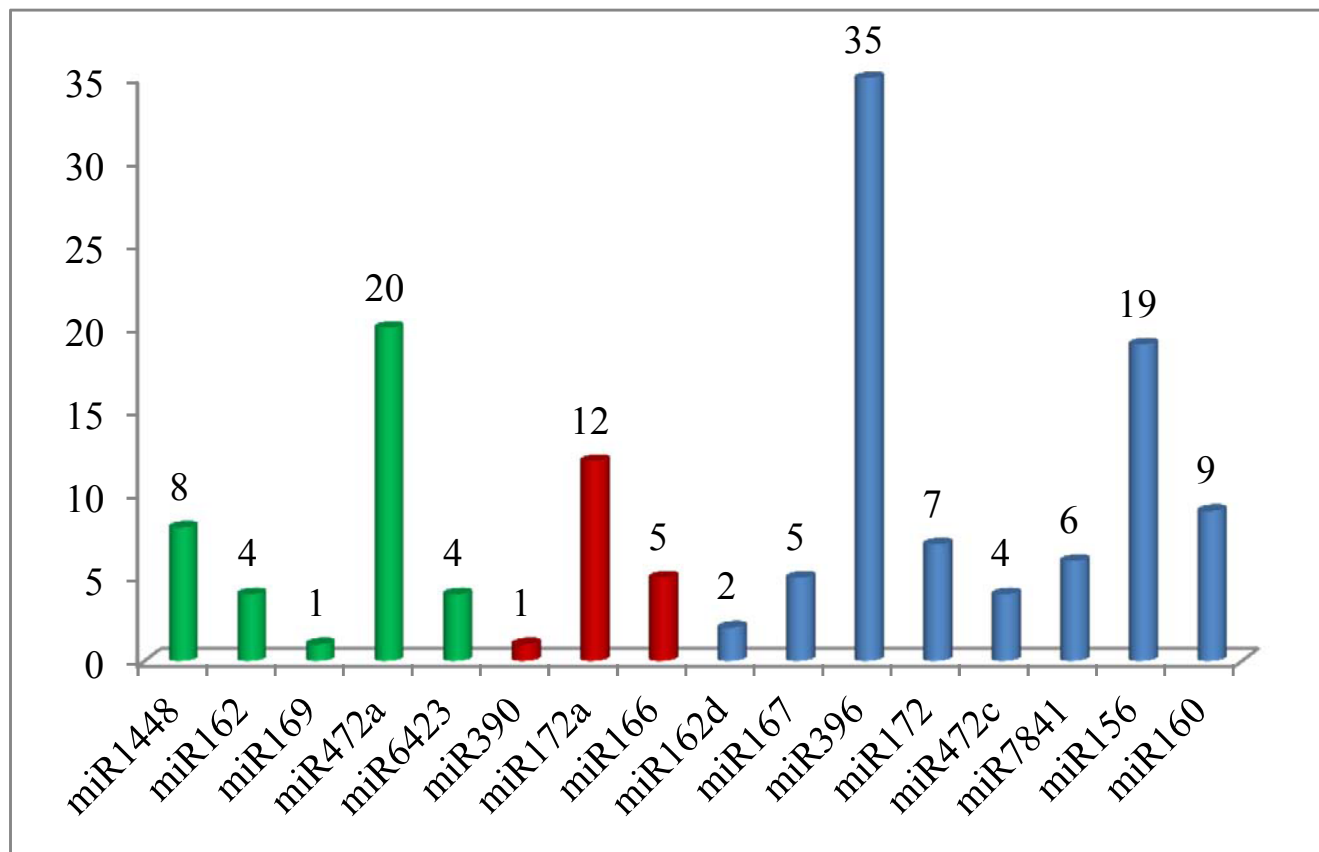

Supplement: f1 [file 9614596.f1.zip]

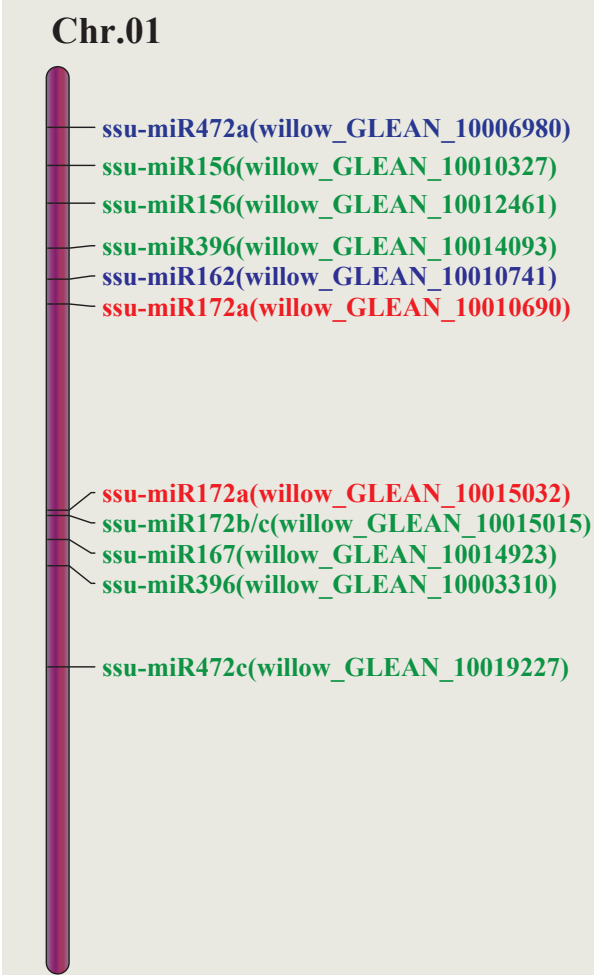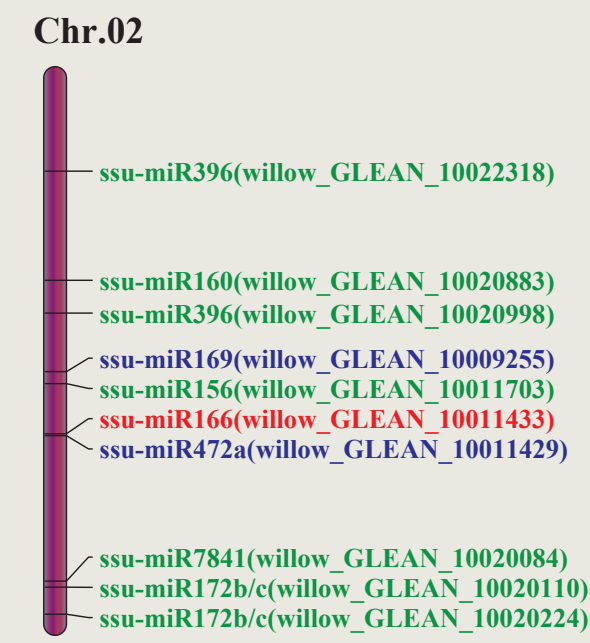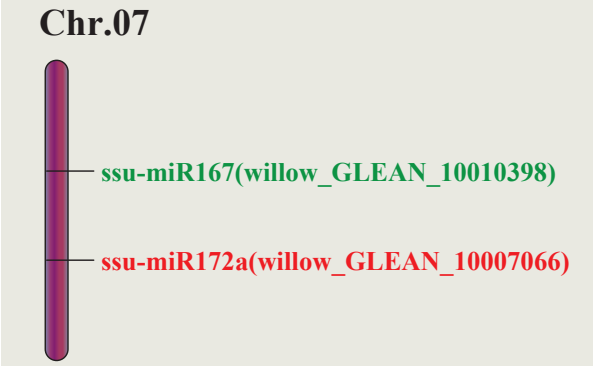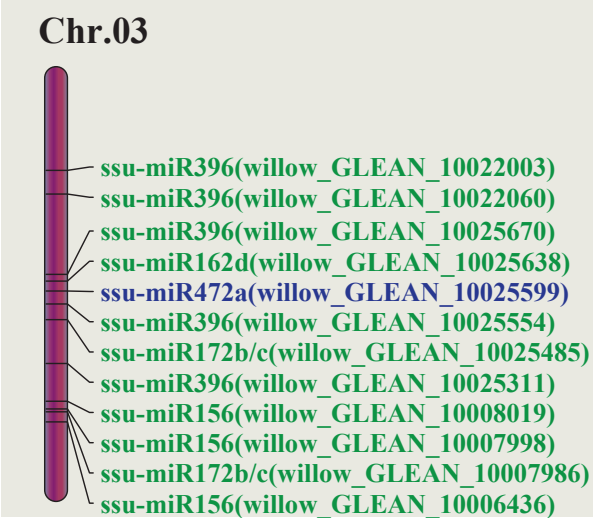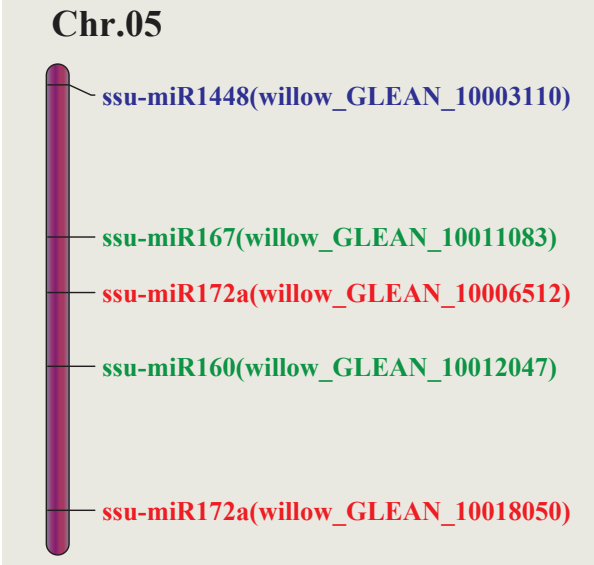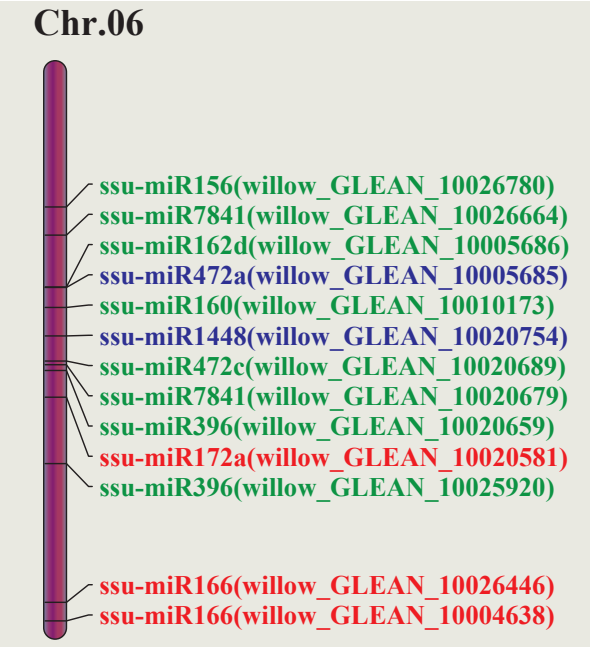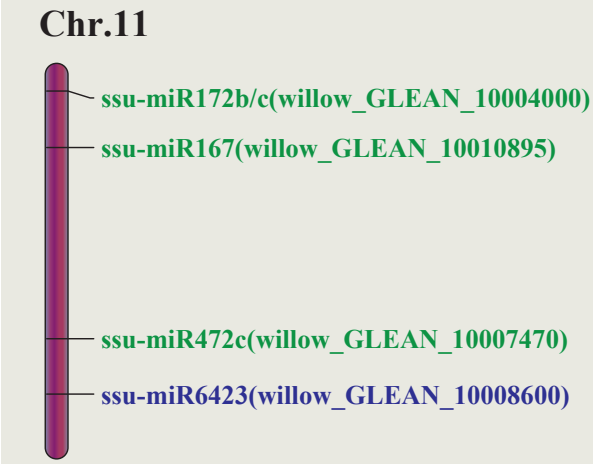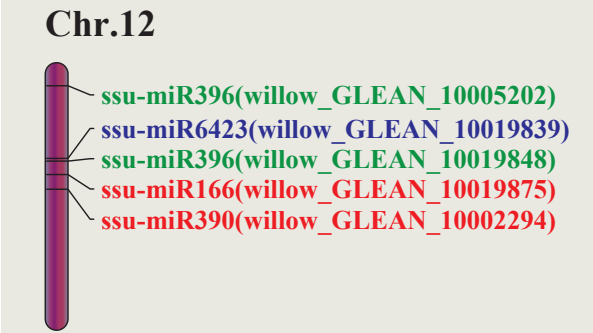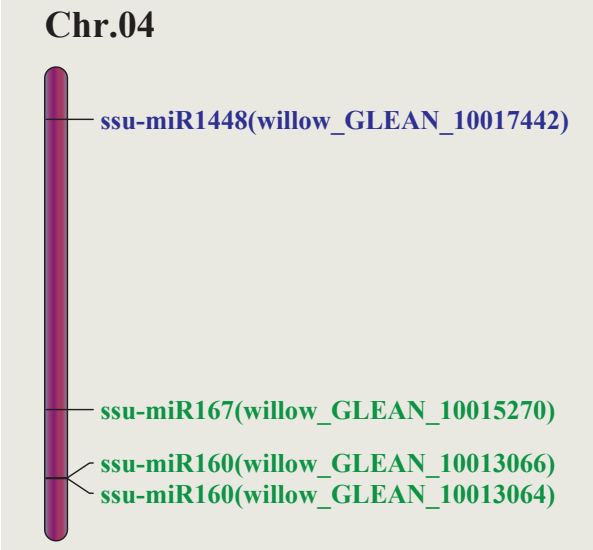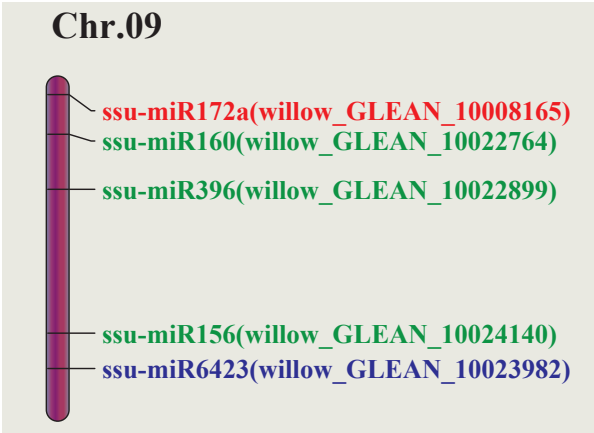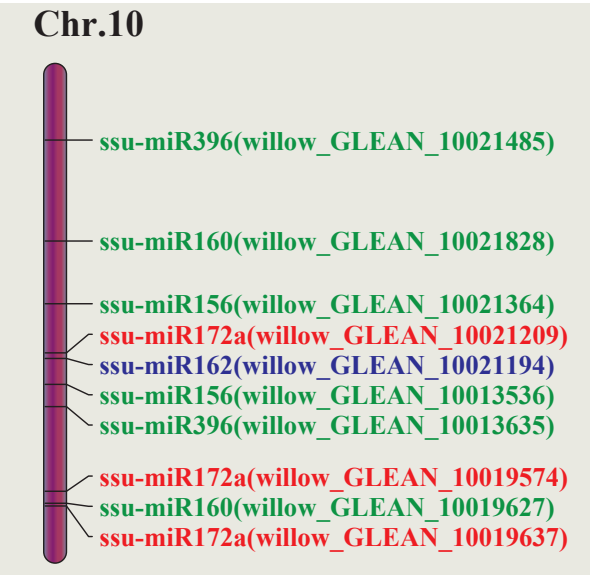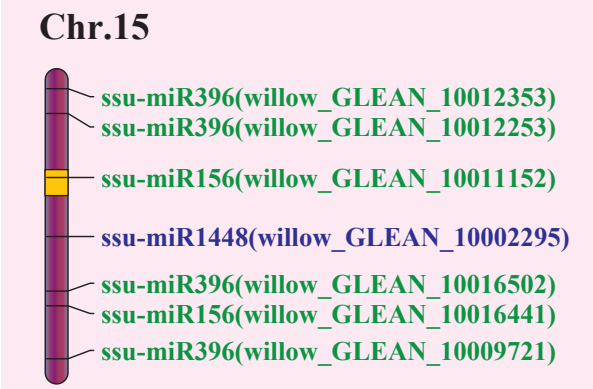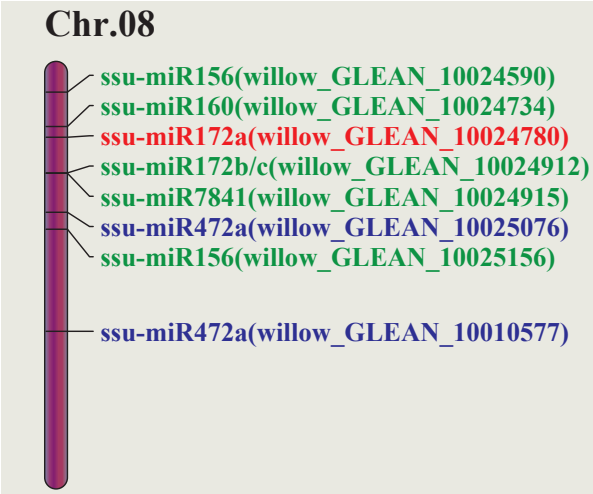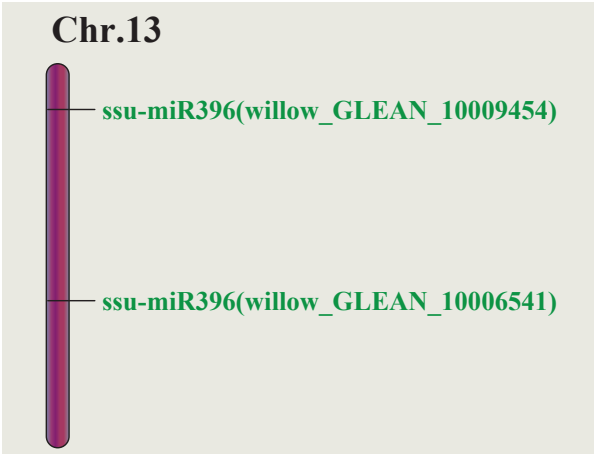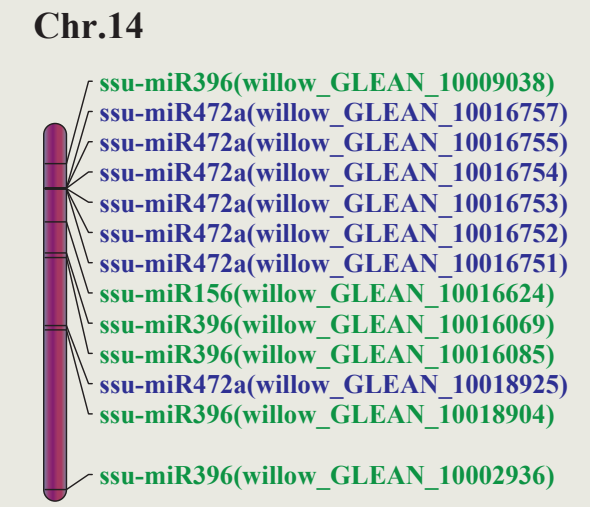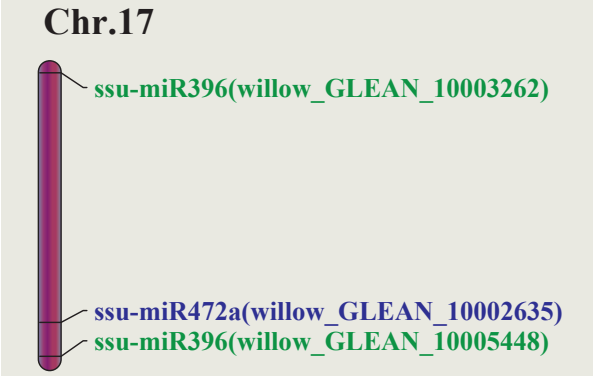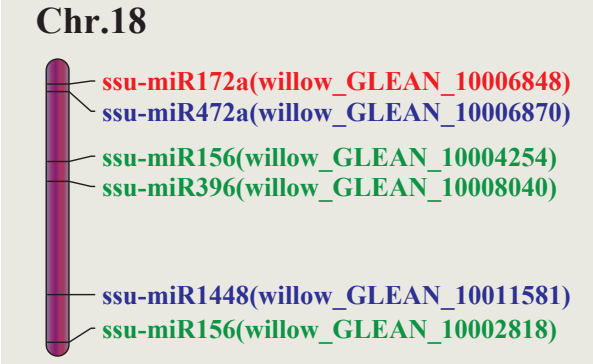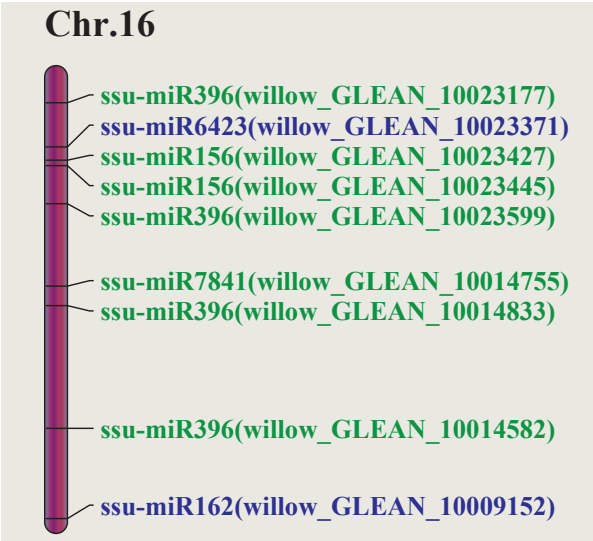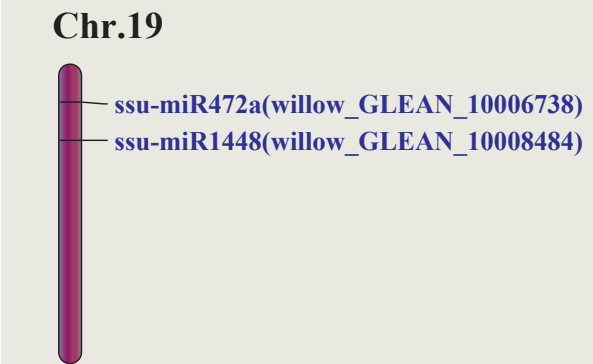

Supplement: f1 [file 9614596.f1.zip]

(A)

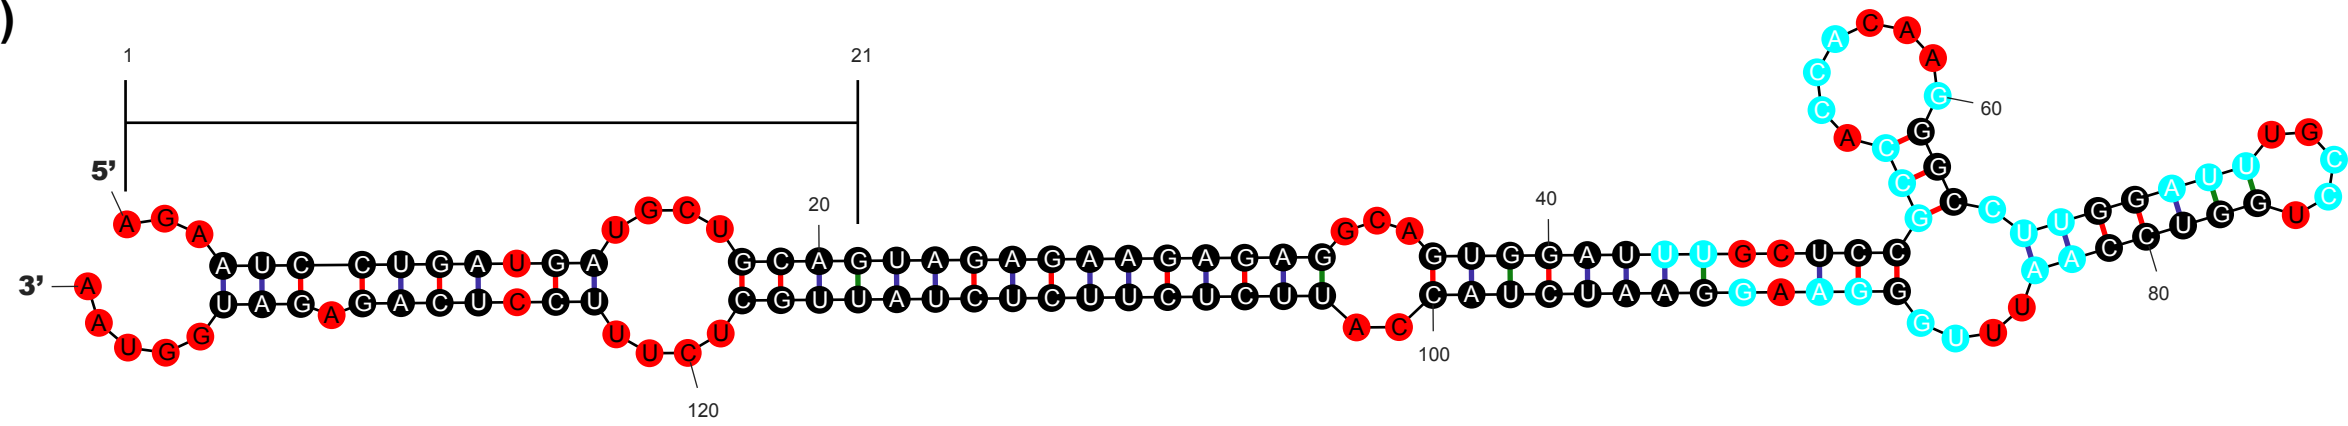

(B)

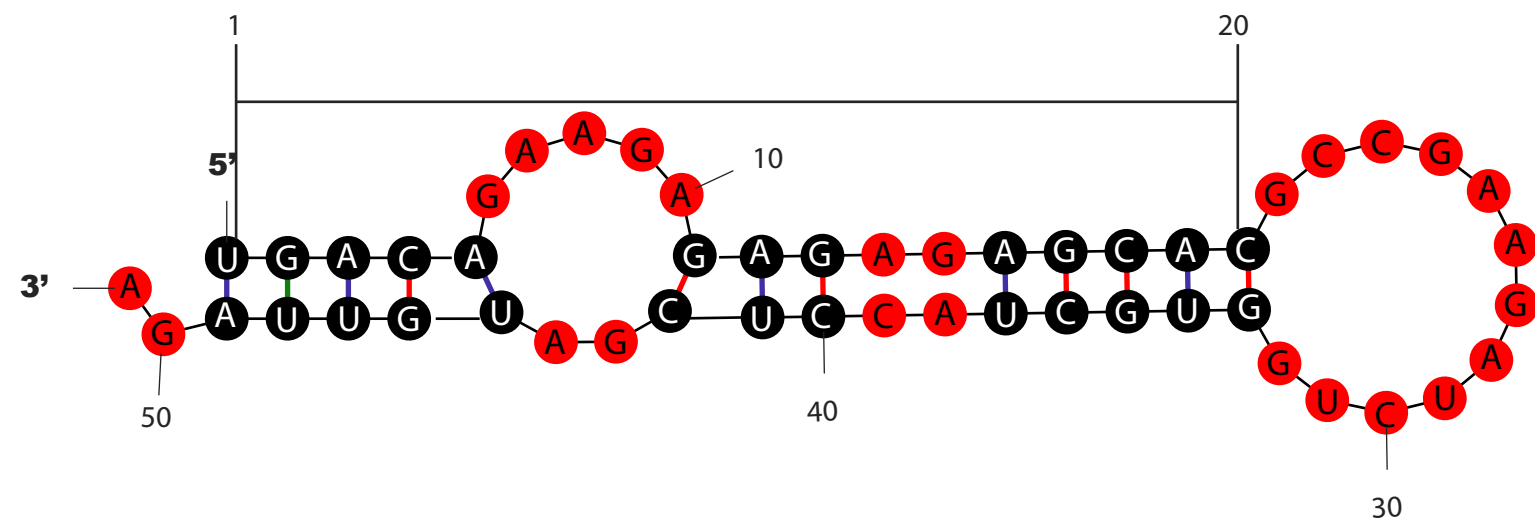

(C)

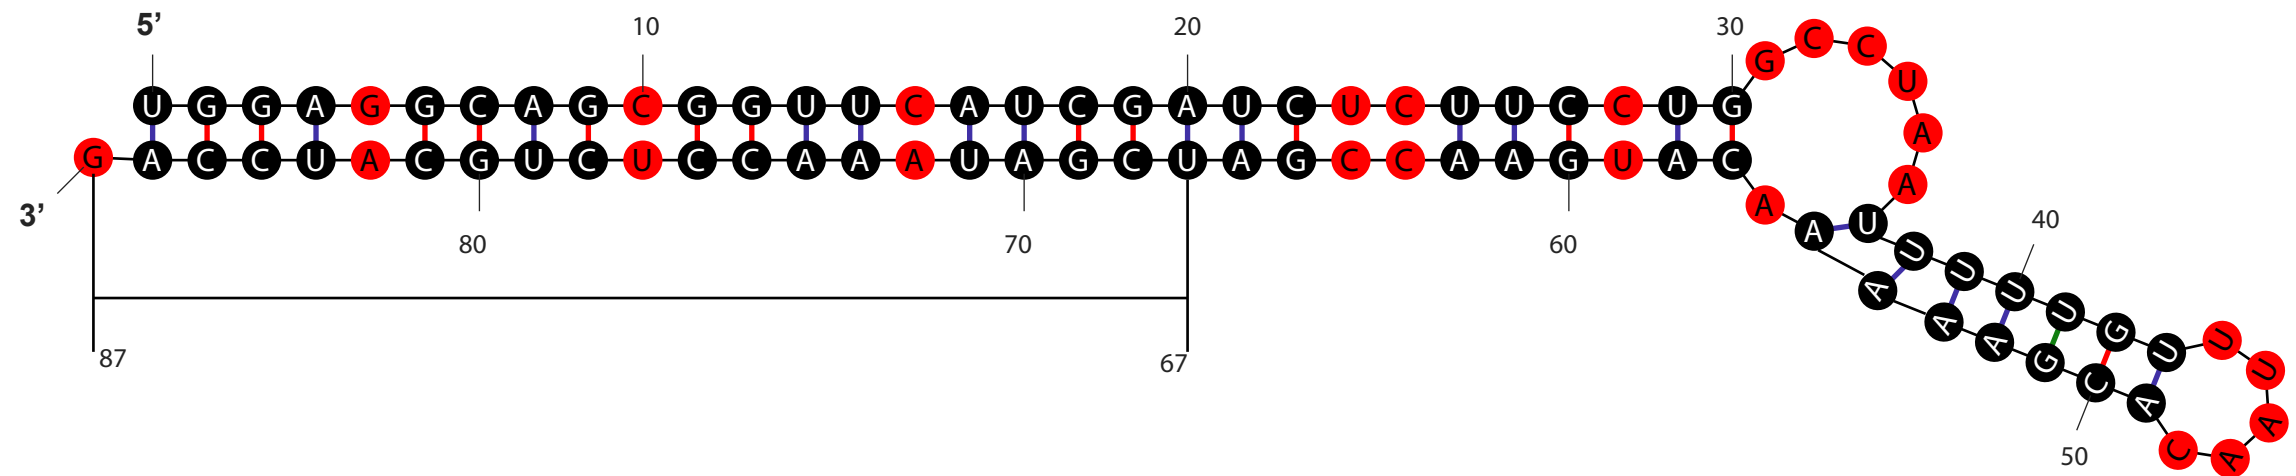

Supplement: f1 [file 9614596.f1.zip]

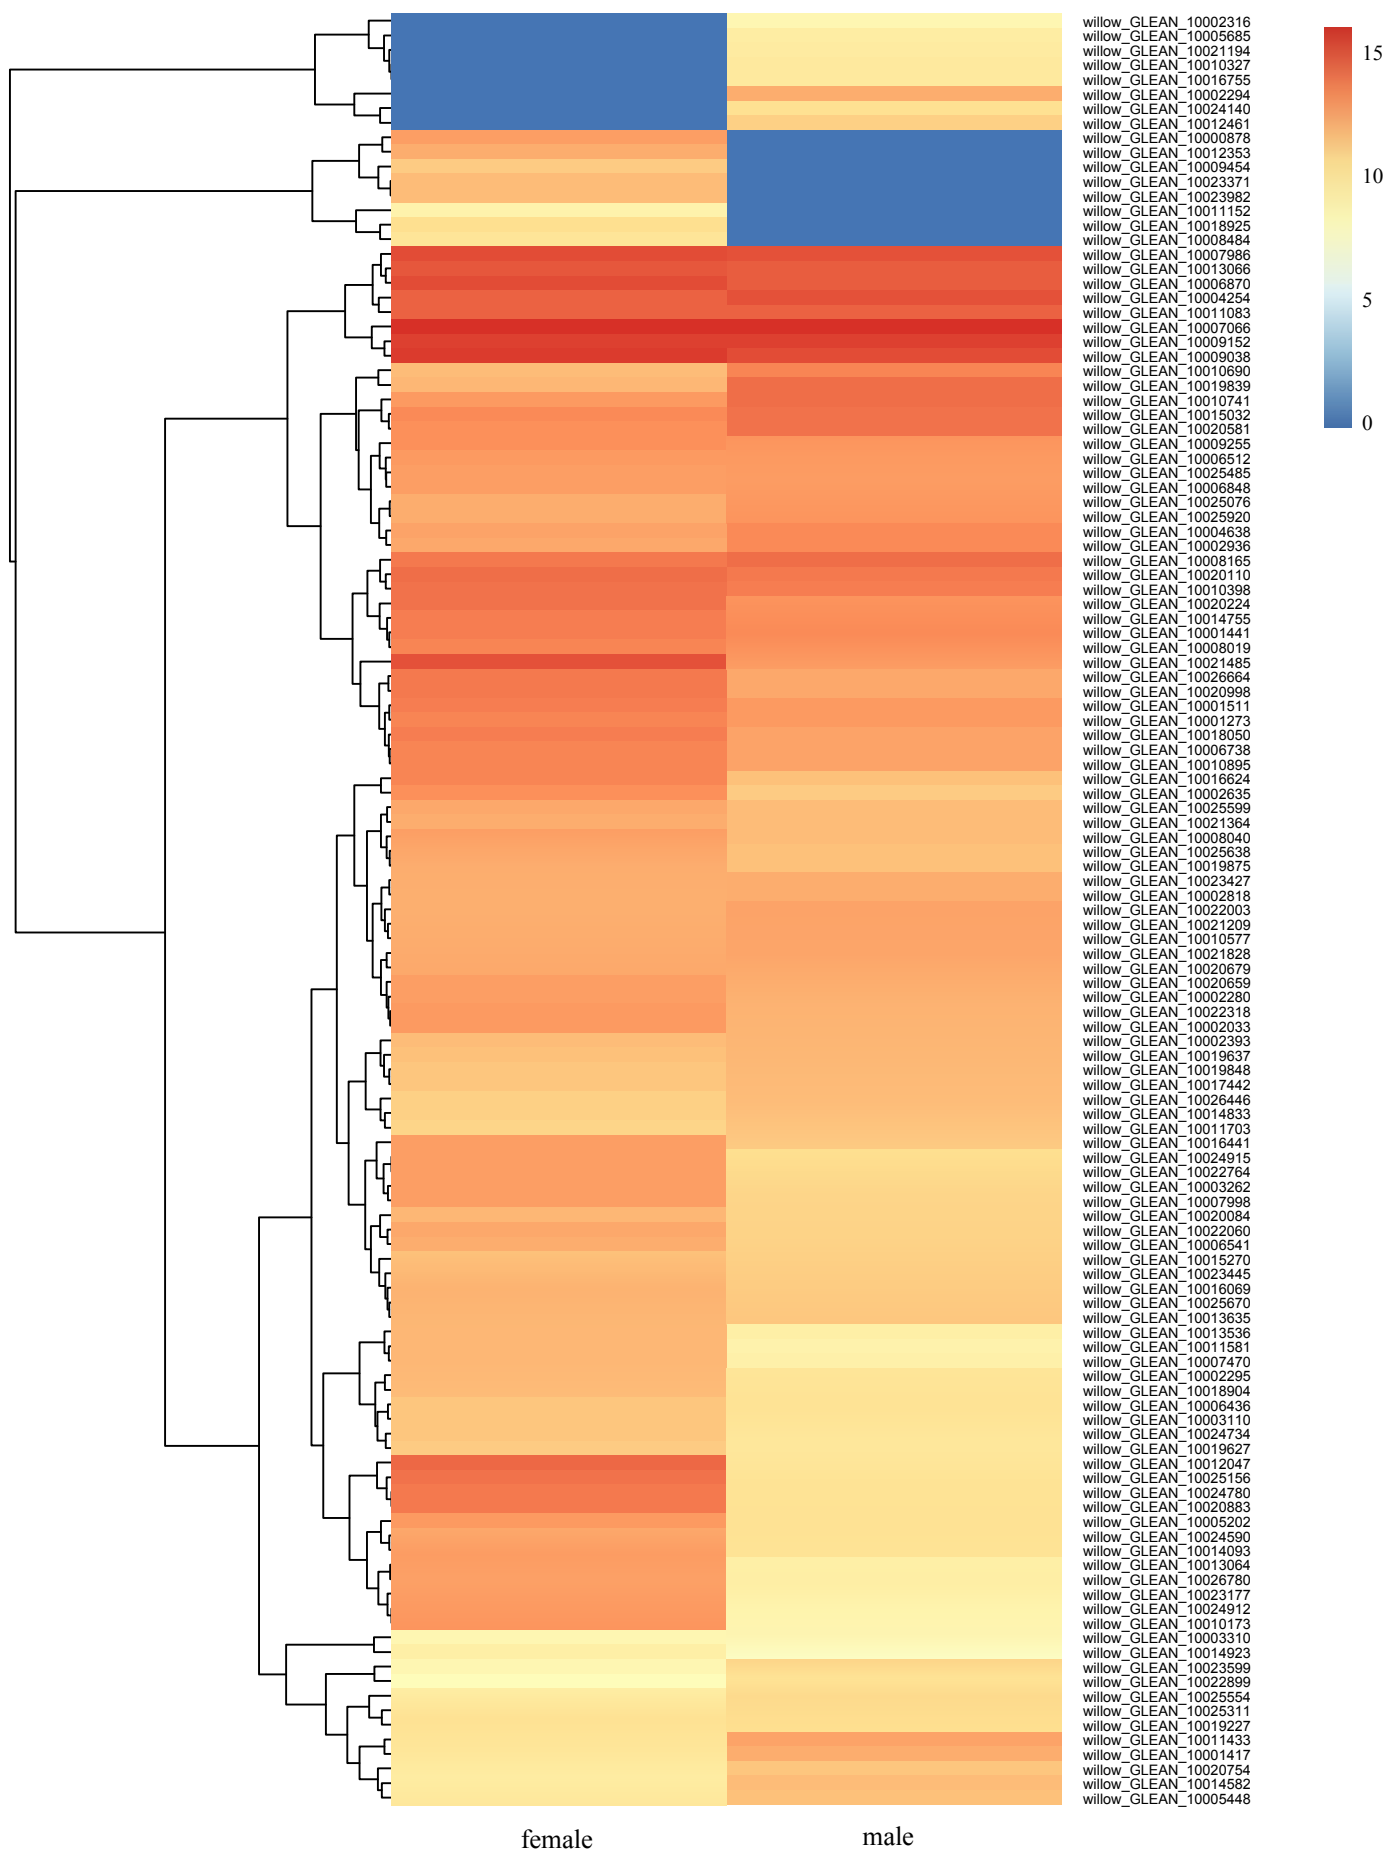

Supplement: f1 [file 9614596.f1.zip]

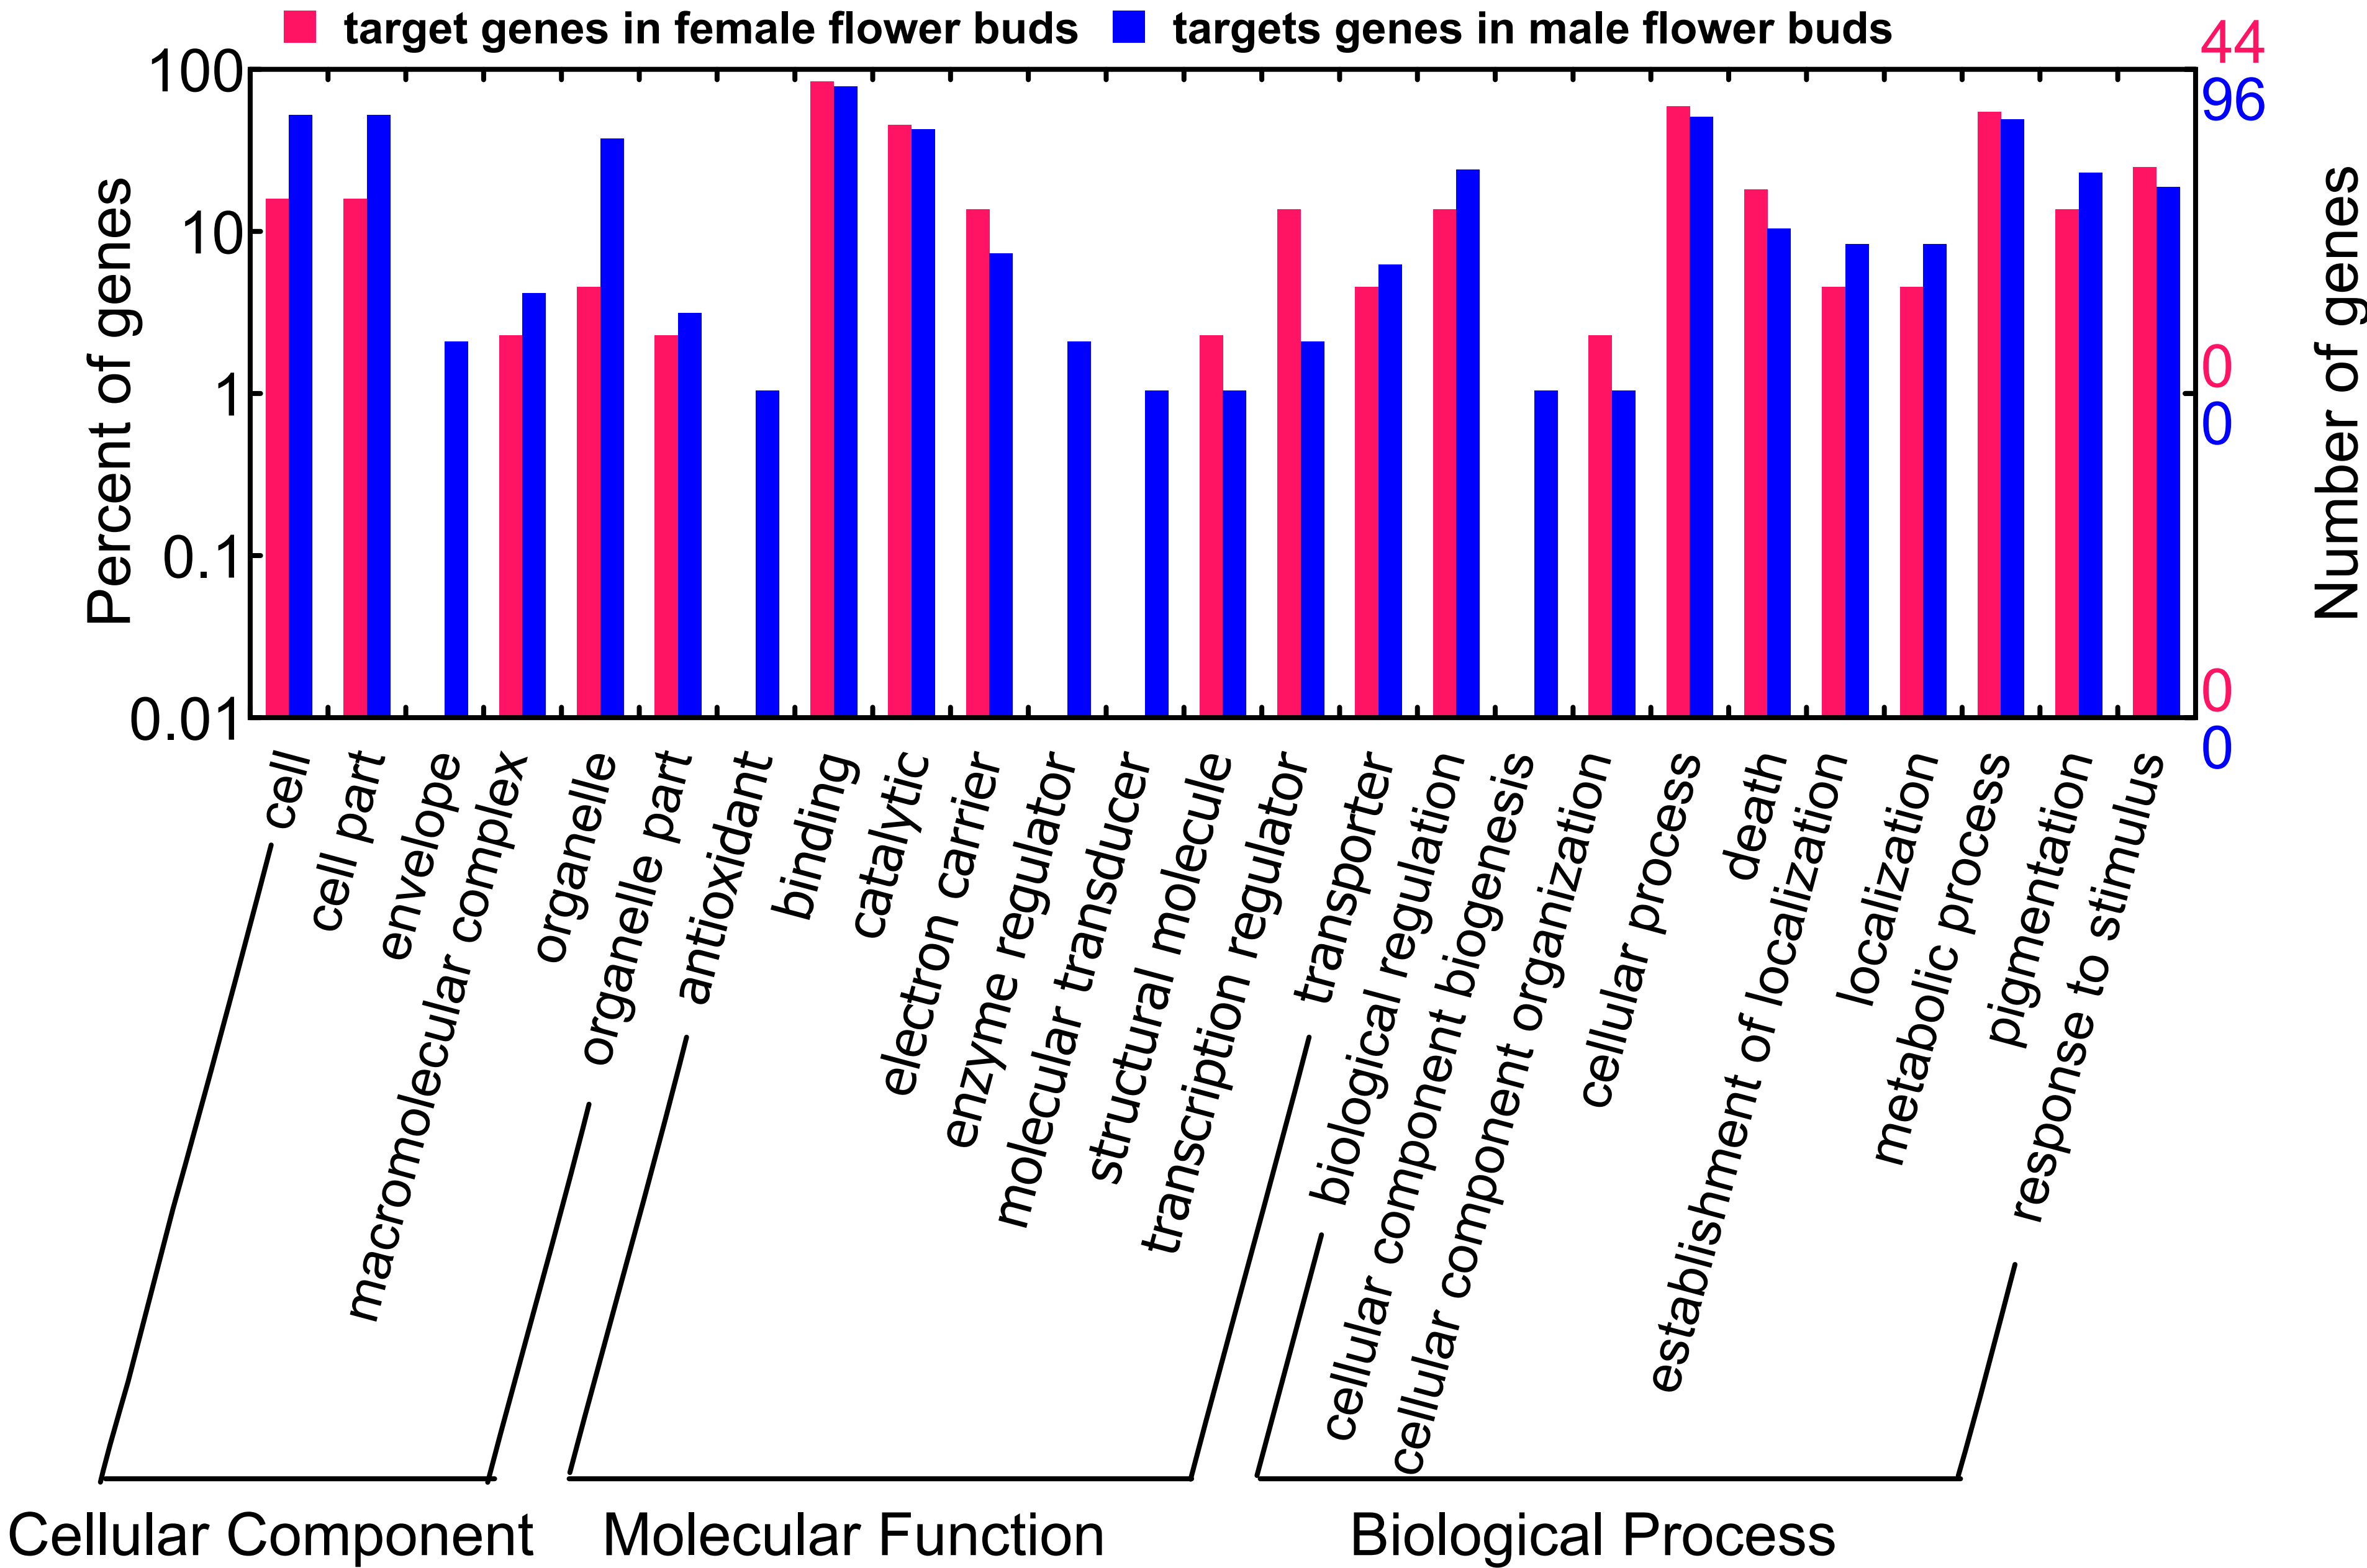

Supplement: f1 [file 9614596.f1.zip]
